# Supplementary material for: Direct Z-scheme WO3/covalent organic framework (COF) heterostructure for enhanced photocatalytic hydrogen peroxide production in water
Source: Royal Society of Chemistry journal article supplement (doi:10.1039/d3cy00878a), 2023-01-01
Supplement: d3cy00878a1.pdf [file d3cy00878a1.pdf]

**Direct Z-scheme WO<sub>3</sub>/Covalent organic frameworks (COFs)  
heterostructure for enhanced photocatalytic hydrogen peroxide  
production in water**

*Yepeng Yang, Yuan Li, Xiaoqian Ma, Lanxin Xie, Die Lv, Liang Jiang, Jiao He, Daomei*

*Chen, Jiaqiang Wang\**

School of Chemical Sciences & Technology, National Center for International Research  
on Photoelectric and Energy Materials, Yunnan Province Engineering Research Center  
of Photocatalytic Treatment of Industrial Wastewater, School of Materials and Energy,  
School of Engineering, Yunnan University, Kunming 650091, P. R. China.

\* Corresponding author. Tel.: +86-871-65031567

Fax: +86-871-65031567

E-mail address: jqwang@ynu.edu.cn (J. Wang)

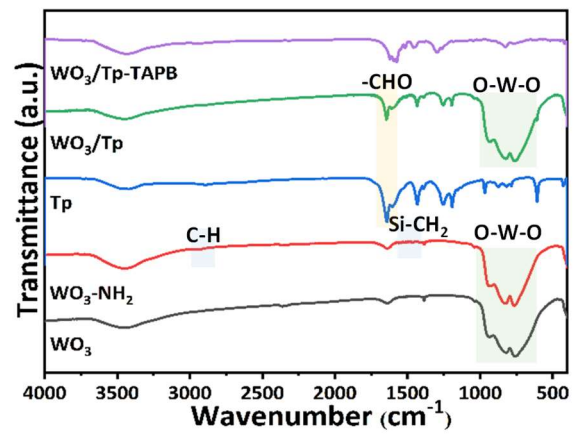

**Fig. S1.** FT-IR survey spectra of  $\text{WO}_3$ ,  $\text{WO}_3\text{-NH}_2$ , Tp,  $\text{WO}_3/\text{Tp}$  and  $\text{WO}_3/\text{Tp-TAPB}$

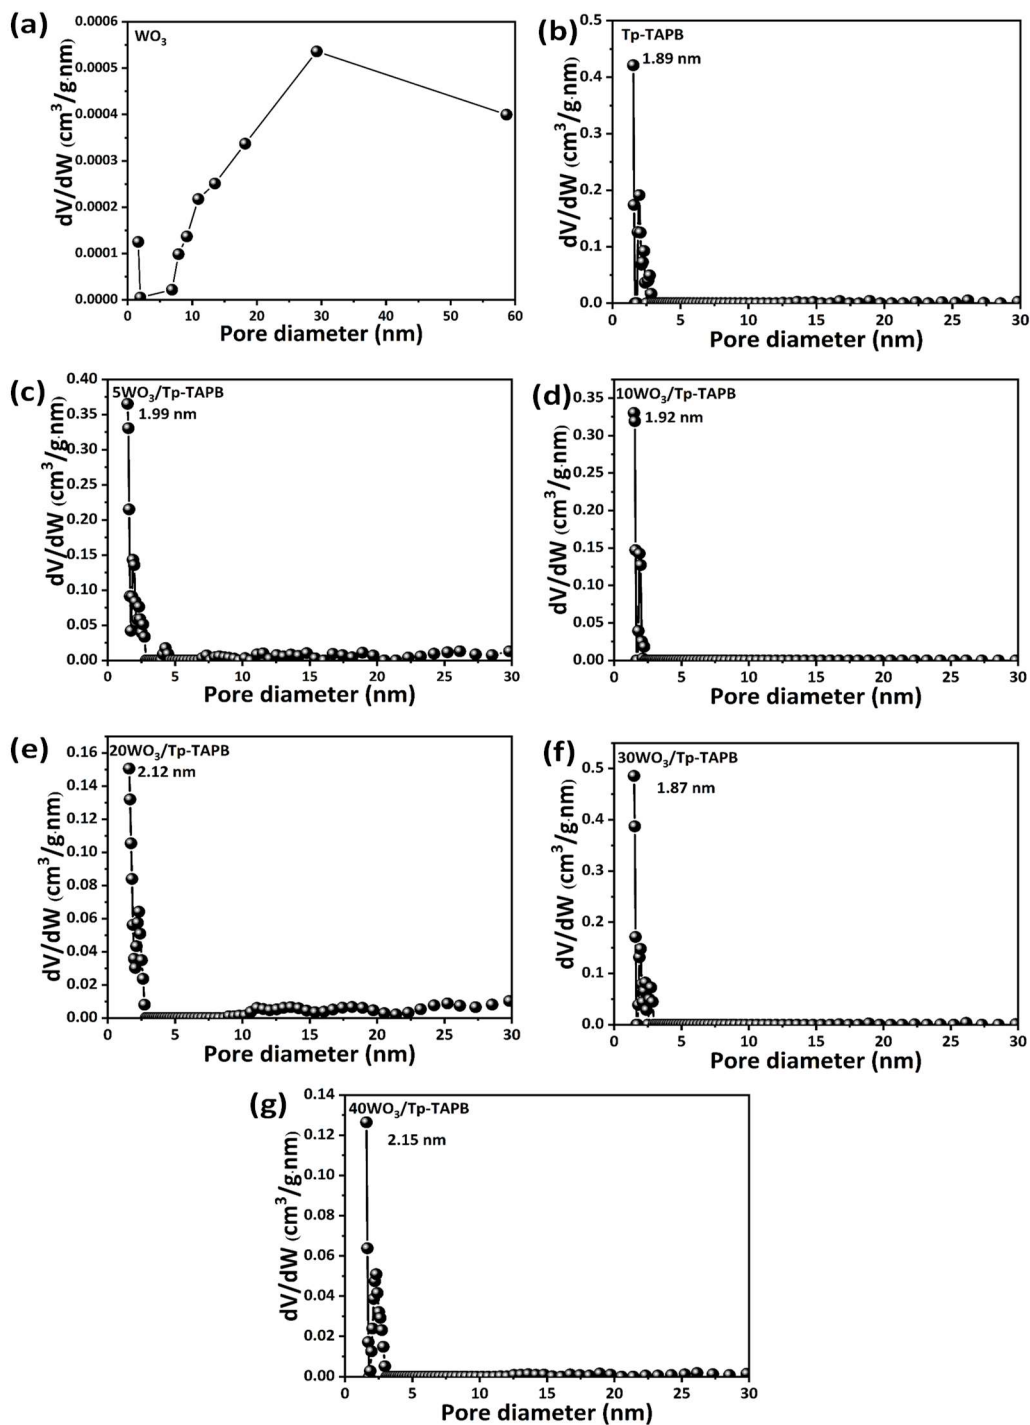

**Fig. S2.** (a) Pore size distributions estimated by BJH of  $\text{WO}_3$ ; (b) Pore size distributions estimated by NLDFT of Tp-TAPB; (c) Pore size distributions estimated by NLDFT of  $5\text{WO}_3/\text{Tp-TAPB}$ ; (d) Pore size distributions estimated by NLDFT of  $10\text{WO}_3/\text{Tp-TAPB}$ ; (e) Pore size distributions estimated by NLDFT of  $20\text{WO}_3/\text{Tp-TAPB}$ ; (f) Pore size distributions estimated by NLDFT of  $30\text{WO}_3/\text{Tp-TAPB}$ ; (g) Pore size distributions estimated by NLDFT of  $40\text{WO}_3/\text{Tp-TAPB}$

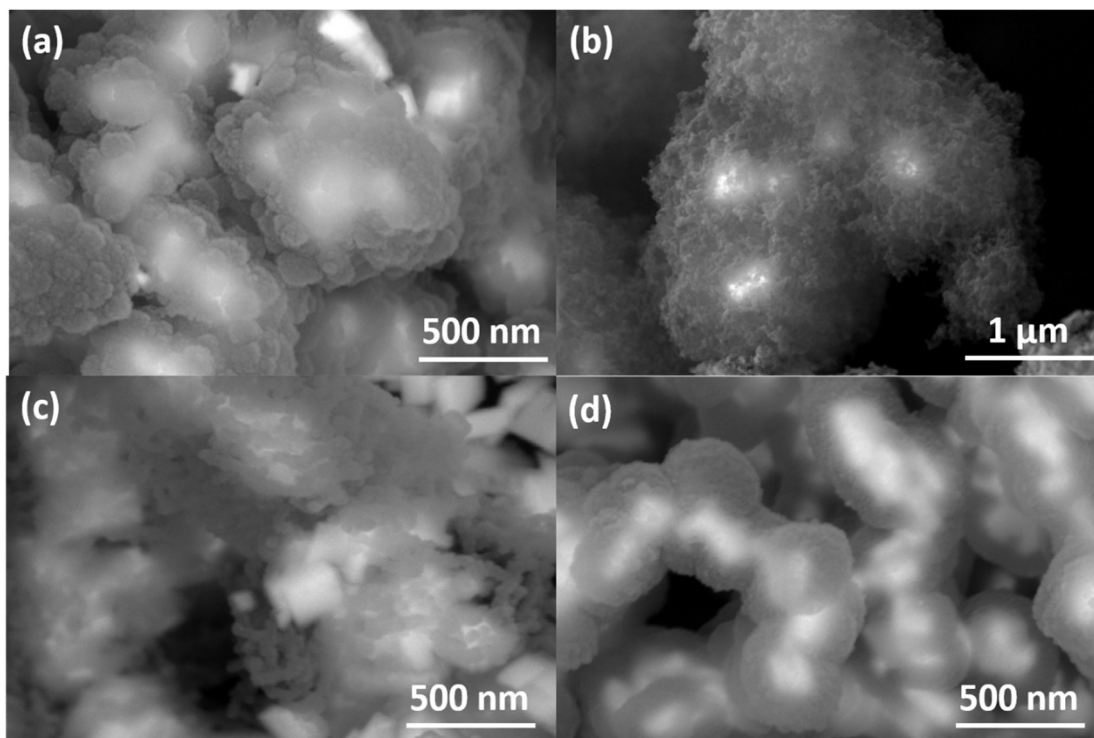

**Fig. S3.** SEM and image of (a) 5WO<sub>3</sub>/Tp-TAPB; (b) 10WO<sub>3</sub>/Tp-TAPB; (c) 30WO<sub>3</sub>/Tp-TAPB; (d) 40WO<sub>3</sub>/Tp-TAPB

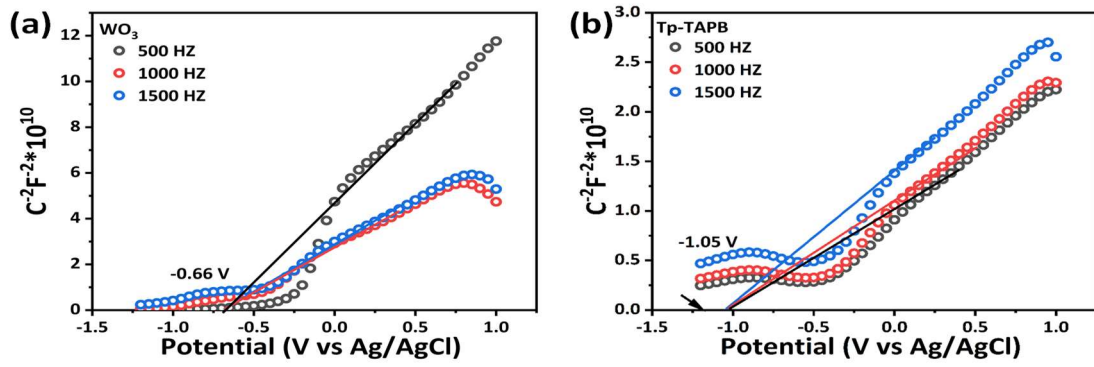

**Fig. S4.** (a) Mott-Schottky plots of  $\text{WO}_3$ , (b) Mott-Schottky plots of Tp-TAPB

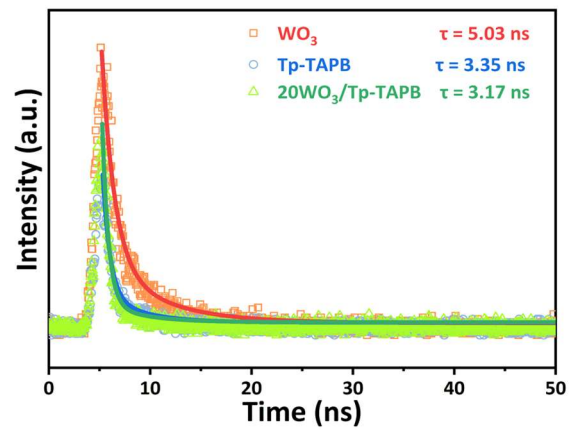

Fig. S5. TRPL spectra of  $WO_3$ , Tp-TAPB and  $20WO_3/Tp-TAPB$

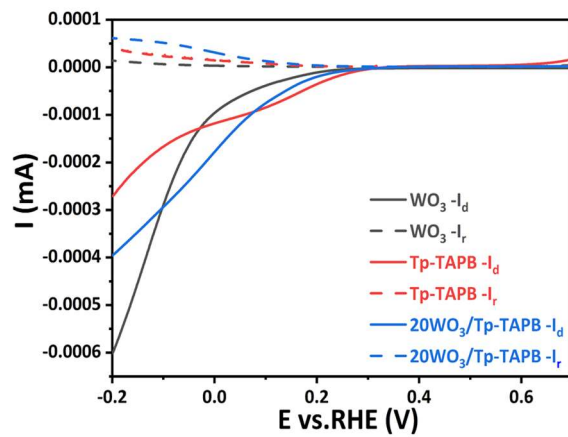

**Fig. S6.** LSV curves of  $\text{WO}_3$ , Tp-TAPB and  $20\text{WO}_3/\text{Tp-TAPB}$  obtained using an RRDE with a rotating speed of 1600 rpm

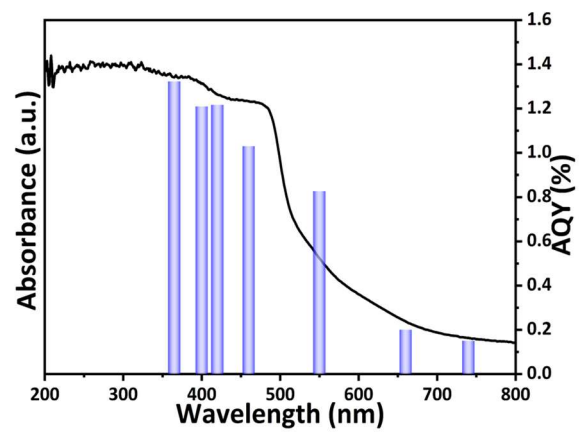

**Fig. S7.** AQY values of 20WO<sub>3</sub>/Tp-TAPB under different monochromatic light irradiation and UV-visible DRS spectra



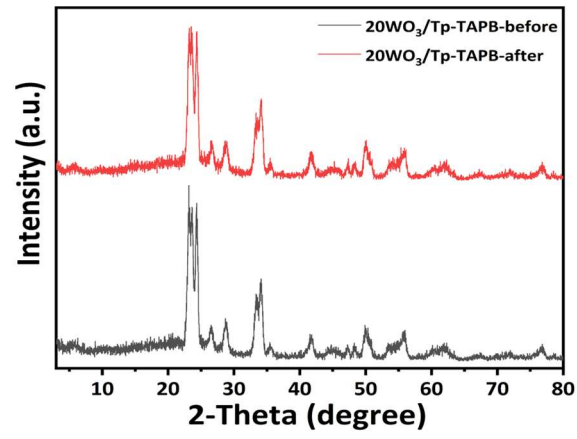

**Fig. S8.** XRD pattern of 20WO<sub>3</sub>/Tp-TAPB before and after photocatalytic reaction

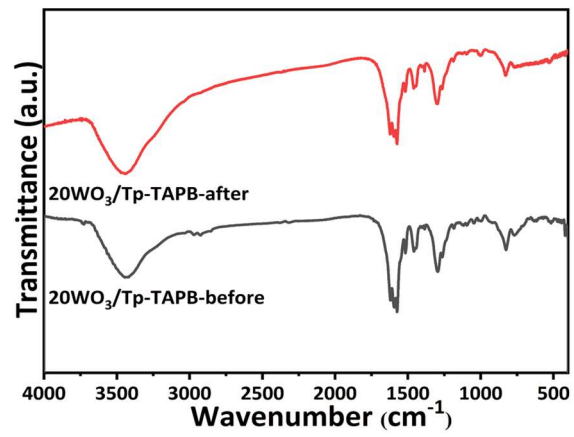

**Fig. S9.** FT-IR survey spectra of 20WO<sub>3</sub>/Tp-TAPB before and after photocatalytic reaction

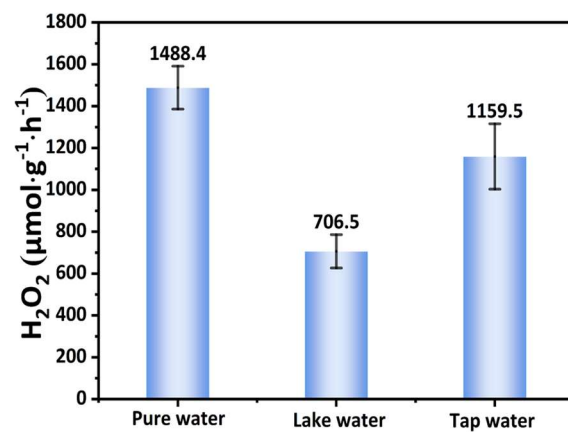

**Fig. S10.** The photocatalytic H<sub>2</sub>O<sub>2</sub> production over 20WO<sub>3</sub>/Tp-TAPB in tap water and lake water (Condition: 5 mg catalyst, 10 mL H<sub>2</sub>O + O<sub>2</sub>, LED light ( $\lambda > 420$  nm))

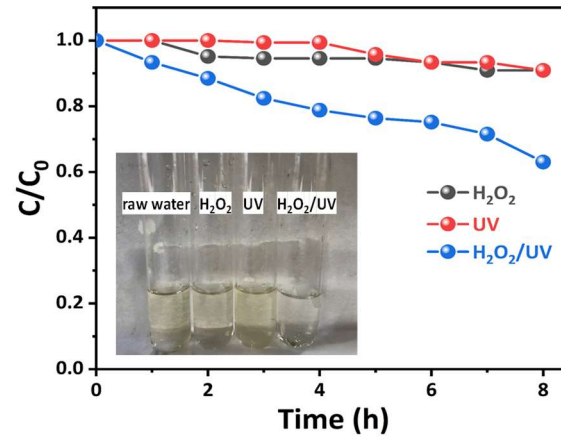

**Fig. S11.** The removal efficiency of COD by H<sub>2</sub>O<sub>2</sub>, UV and H<sub>2</sub>O<sub>2</sub>/UV (Raw water COD concentration = 110mg/L, 50 mL Coking water + 5 mL H<sub>2</sub>O<sub>2</sub>)

**Table S1.** BET surface areas of the samples

| Samples                     | BET surface areas (m <sup>2</sup> /g) |
|-----------------------------|---------------------------------------|
| WO <sub>3</sub>             | 7.02                                  |
| Tp-TAPB                     | 608.26                                |
| 5WO <sub>3</sub> / Tp-TAPB  | 547.15                                |
| 10WO <sub>3</sub> / Tp-TAPB | 489.89                                |
| 20WO <sub>3</sub> / Tp-TAPB | 306.60                                |
| 30WO <sub>3</sub> / Tp-TAPB | 301.89                                |
| 40WO <sub>3</sub> / Tp-TAPB | 246.37                                |

**Table S2.** The WO<sub>3</sub> composition of WO<sub>3</sub>/Tp-TAPB

| Samples                    | WO <sub>3</sub> composition (%) |
|----------------------------|---------------------------------|
| 5WO <sub>3</sub> /Tp-TAPB  | 3.08                            |
| 10WO <sub>3</sub> /Tp-TAPB | 11.62                           |
| 20WO <sub>3</sub> /Tp-TAPB | 21.92                           |
| 30WO <sub>3</sub> /Tp-TAPB | 26.29                           |
| 40WO <sub>3</sub> /Tp-TAPB | 34.60                           |

**Table S3.** Comparison of photocatalytic H<sub>2</sub>O<sub>2</sub> production with other photocatalysts

| Samples                                           | H <sub>2</sub> O <sub>2</sub> generation rate              | Solvent                 | References |
|---------------------------------------------------|------------------------------------------------------------|-------------------------|------------|
| CHF-DPDA                                          | 256 $\mu\text{mol}\cdot\text{g}^{-1}\cdot\text{h}^{-1}$    | H <sub>2</sub> O        | 1          |
| TPB-DMTP-COF                                      | 2882 $\mu\text{mol}\cdot\text{g}^{-1}\cdot\text{h}^{-1}$   | H <sub>2</sub> O        | 2          |
| COF-TfpBpy                                        | 1970 $\mu\text{mol}\cdot\text{L}^{-1}\cdot\text{h}^{-1}$   | H <sub>2</sub> O        | 3          |
| TiCOF-spn                                         | 489.94 $\mu\text{mol}\cdot\text{g}^{-1}\cdot\text{h}^{-1}$ | H <sub>2</sub> O        | 4          |
| HEP-TAPT-COF                                      | 87.50 $\mu\text{mol}\cdot\text{h}^{-1}$                    | H <sub>2</sub> O        | 5          |
| TAPB-PDA-H <sub>2</sub>                           | 1349.3 $\mu\text{mol}\cdot\text{g}^{-1}\cdot\text{h}^{-1}$ | H <sub>2</sub> O        | 6          |
| TAPB-PDA-OH                                       | 1841.3 $\mu\text{mol}\cdot\text{g}^{-1}\cdot\text{h}^{-1}$ | H <sub>2</sub> O        | 6          |
| TAPB-PDA-OCH <sub>3</sub>                         | 869.1 $\mu\text{mol}\cdot\text{g}^{-1}\cdot\text{h}^{-1}$  | H <sub>2</sub> O        | 6          |
| TAPB-PDA-CH <sub>3</sub>                          | 857.8 $\mu\text{mol}\cdot\text{g}^{-1}\cdot\text{h}^{-1}$  | H <sub>2</sub> O        | 6          |
| TAPD-(Me) <sub>2</sub> COF                        | 234.52 $\mu\text{mol}\cdot\text{g}^{-1}\cdot\text{h}^{-1}$ | H <sub>2</sub> O + EtOH | 7          |
| CTF-NS-5BT                                        | 1630 $\mu\text{mol}\cdot\text{g}^{-1}\cdot\text{h}^{-1}$   | H <sub>2</sub> O + BA   | 8          |
| TpMa/CN-5                                         | 880.46 $\mu\text{mol}\cdot\text{L}^{-1}$                   | H <sub>2</sub> O + IPA  | 9          |
| TiO <sub>2</sub> /COF                             | 740 $\mu\text{mol}\cdot\text{L}^{-1}\cdot\text{h}^{-1}$    | furfuryl alcohol        | 10         |
| ZnIn <sub>2</sub> S <sub>4</sub> /TpPa-1          | 516 $\mu\text{mol}\cdot\text{L}^{-1}$ (2h)                 | H <sub>2</sub> O + EtOH | 11         |
| CDs@CTFs                                          | 535.41 $\mu\text{mol}\cdot\text{g}^{-1}\cdot\text{h}^{-1}$ | H <sub>2</sub> O        | 12         |
| ZnO/COF                                           | 2443 $\mu\text{mol}\cdot\text{g}^{-1}\cdot\text{h}^{-1}$   | H <sub>2</sub> O + EtOH | 13         |
| MnIn <sub>2</sub> S <sub>4</sub> /WO <sub>3</sub> | 1188 $\mu\text{mol}\cdot\text{g}^{-1}\cdot\text{h}^{-1}$   | H <sub>2</sub> O        | 14         |
| ZnO/WO <sub>3</sub>                               | 6788 $\mu\text{mol}\cdot\text{L}^{-1}\cdot\text{h}^{-1}$   | H <sub>2</sub> O + EtOH | 15         |
| KCN10/WO <sub>3</sub>                             | 1.33 mmol/L                                                | H <sub>2</sub> O + EtOH | 16         |
| Au/WO <sub>3</sub>                                | 544 $\mu\text{M}$                                          | H <sub>2</sub> O + MeOH | 17         |
| Tp-TAPB                                           | 528.3 $\mu\text{mol}\cdot\text{g}^{-1}\cdot\text{h}^{-1}$  | H <sub>2</sub> O        | This work  |
| 20WO <sub>3</sub> /Tp-TAPB                        | 1488.4 $\mu\text{mol}\cdot\text{g}^{-1}\cdot\text{h}^{-1}$ | H <sub>2</sub> O        | This work  |

## References:

1. H. Cheng, H. Lv, J. Cheng, L. Wang, X. Wu and H. Xu, *Adv. Mater.*, 2022, **34**, e2107480.
2. L. J. Li, L. P. Xu, Z. F. Hu and J. C. Yu, *Adv. Funct. Mater.*, 2021, **31**, 2106120.
3. J. N. Chang, Q. Li, J. W. Shi, M. Zhang, L. Zhang, S. Li, Y. Chen, S. L. Li and Y. Q. Lan, *Angew. Chem. Int. Edit.*, 2023, **62**, e202218868.
4. W.-K. Han, H.-S. Lu, J.-X. Fu, X. Liu, X. Zhu, X. Yan, J. Zhang, Y. Jiang, H. Dong and Z.-G. Gu, *Chem. Eng. J.*, 2022, **449**, 137802.
5. D. Chen, W. Chen, Y. Wu, L. Wang, X. Wu, H. Xu and L. Chen, *Angew. Chem. Int. Edit.*, 2022, **135**, e202217479.
6. Y. P. Yang, J. X. Kang, Y. Li, J. J. Liang, J. X. Liang, L. Jiang, D. M. Chen, J. He, Y. J. Chen and J. Q. Wang, *New. J. Chem.*, 2022, **46**, 21605-21614.
7. C. Krishnaraj, H. Sekhar Jena, L. Bourda, A. Laemont, P. Pachfule, J. Roeser, C. V. Chandran, S. Borgmans, S. M. J. Rogge, K. Leus, C. V. Stevens, J. A. Martens, V. Van Speybroeck, E. Breynaert, A. Thomas and P. Van Der Voort, *J. Am. Chem. Soc.*, 2020, **142**, 20107-20116.
8. X. Yu, B. Viengkeo, Q. He, X. Zhao, Q. Huang, P. Li, W. Huang and Y. Li, *Adv. Sustain. Syst.*, 2021, **5**, 2100184.
9. H. Wang, E. Almatrafi, Z. Wang, Y. Yang, T. Xiong, H. Yu, H. Qin, H. Yang, Y. He, C. Zhou, G. Zeng and P. Xu, *J. Colloid. Interface. Sci.*, 2022, **608**, 1051-1063.
10. Y. Yang, J. Liu, M. Gu, B. Cheng, L. Wang and J. Yu, *Appl. Catal. B-Environ.*, 2023, **333**, 122780.
11. G. Xia, J. Qiu, L. Zhang, D. Dai and J. Yao, *Colloid. Surface. A.*, 2023, **664**, 131124.
12. W. J. Ren, Q. Chang, N. Li, J. L. Yang and S. L. Hu, *Chem. Eng. J.*, 2023, **451**, 139035.
13. Y. Zhang, J. Y. Qiu, B. C. Zhu, M. V. Fedin, B. Cheng, J. G. Yu and L. Y. Zhang, *Chem. Eng. J.*, 2022, **444**, 136584.
14. X. Dang, S. Wu and H. Zhao, *ACS Sustainable Chem. Eng.*, 2022, **10**, 4161-



4172.

15. Z. Jiang, B. Cheng, Y. Zhang, S. Wageh, A. A. Al - Ghamdi, J. Yu and L. Wang, *J. Mater. Sci. Technol.*, 2022, **124**, 193-201.
16. J. H. Shi, Z. C. Liu, Y. F. Luo, C. L. Guo, Y. Z. Li, T. T. Yang, C. K. Ju, H. Wang, X. T. Li and Z. Fan, *Colloid. Surface. A.*, 2021, **623**, 126758.
17. Y. Wang, Y. Wang, J. Zhao, M. Chen, X. Huang and Y. Xu, *Appl. Catal. B- Environ.*, 2021, **284**, 119691.
